# Supplementary material for: A novel all-solid electrolyte based on a co-polymer of poly-(methoxy/hexadecal-poly(ethylene glycol) methacrylate) for lithium-ion cell
Source: Royal Society of Chemistry journal article supplement (doi:10.1039/c2jm34270g), 2012-01-01
Supplement: c2jm34270g.pdf [file c2jm34270g.pdf]

## Supporting Information

# A Novel All-Solid Electrolyte Based on Co-polymer of Poly-(Methoxy/Hexadecyl-Poly(Ethylene Glycol) Methacrylate) for Lithium-ion Cell

Xiang Zuo,<sup>a</sup> Xiao-Min Liu,<sup>a</sup> Feng Cai,<sup>a</sup> Hui Yang,<sup>a,\*</sup> Xiao-Dong Shen<sup>a,\*</sup> and Gao Liu<sup>b</sup>

<sup>a</sup> College of Materials Science and Engineering, Nanjing University of Technology, 5 Ximofan Road, Nanjing, Jiangsu, 210009, P. R. China

<sup>b</sup> Environmental Energy Technologies Division, Lawrence Berkeley National Laboratory, 1 Cyclotron Rd., Berkeley, CA, 94720, USA

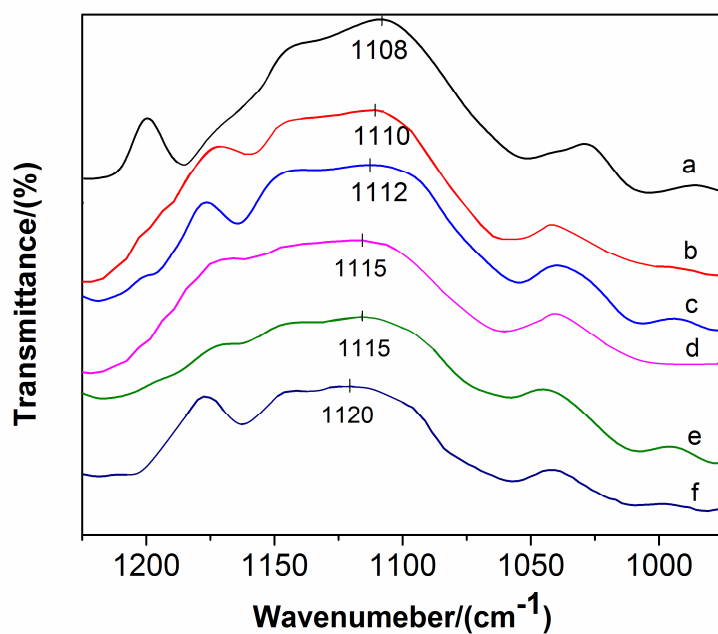

**Fig. S1** IR spectra of the C–O–C groups in different polyethylene glycol derivatives (chemical structures shown in Table 1).

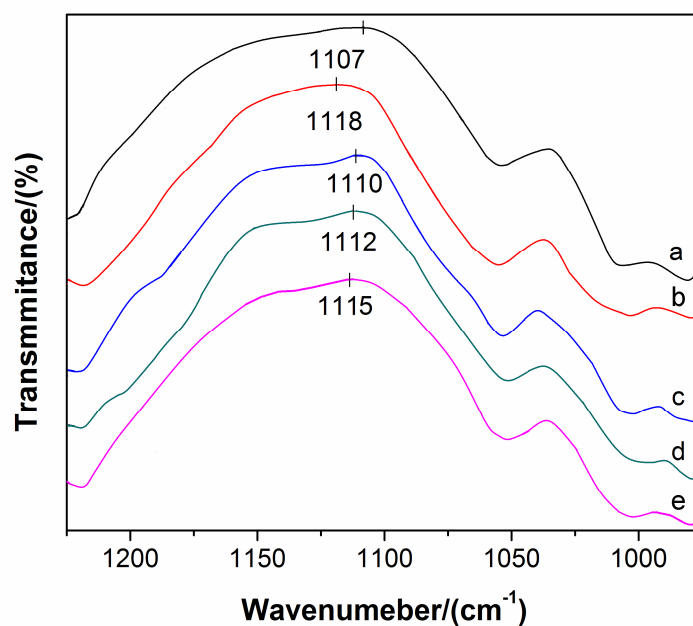

**Fig. S2** IR spectra of the C–O–C groups in polymers. (a) PMPEGM (n=7), (b) PHPEGM, (c) PMH<sub>7</sub>-20, (d) PMH<sub>7</sub>-40, (e) PMH<sub>7</sub>-60.

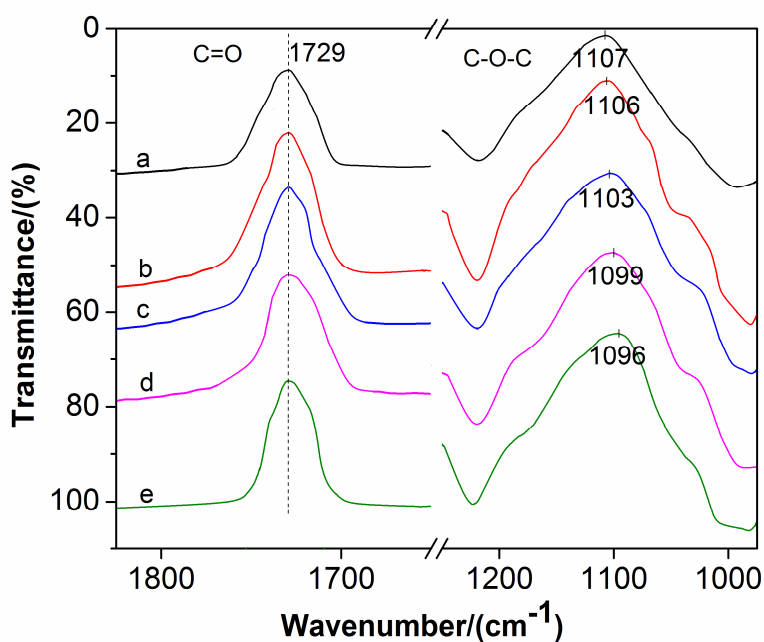

**Fig. S3** IR spectra of the C–O–C and C=O group in electrolytes. (a) PMH<sub>7</sub>-20 ([Li]:[EO] =1:30), (b) PMH<sub>7</sub>-20 ([Li]:[EO] =1:25), (c) PMH<sub>7</sub>-20 ([Li]:[EO] =1:20), (d) PMH<sub>7</sub>-20 ([Li]:[EO] =1:15), (e) PMH<sub>7</sub>-20 ([Li]:[EO] =1:10).

### Thermal stability

The thermal stability of the polymers and electrolyte is analyzed by TGA and shown in Fig S4. The decomposition temperature of the neat PMH<sub>12</sub>-25 polymer is 360.0 °C. When lithium salt are introduced, the degradation temperature of PMH<sub>12</sub>-25 is 277.9 °C. This behavior may be attributed to the weakening of the C-O-C bond and reduction in electronic density, caused by the coordination of ether oxygen with Li<sup>+</sup>. There is no obvious weight loss until the temperature reaches than 200 °C. Therefore, the polymer electrolyte based on PMH<sub>12</sub>-25 seems to be promising for the practical lithium polymer batteries.

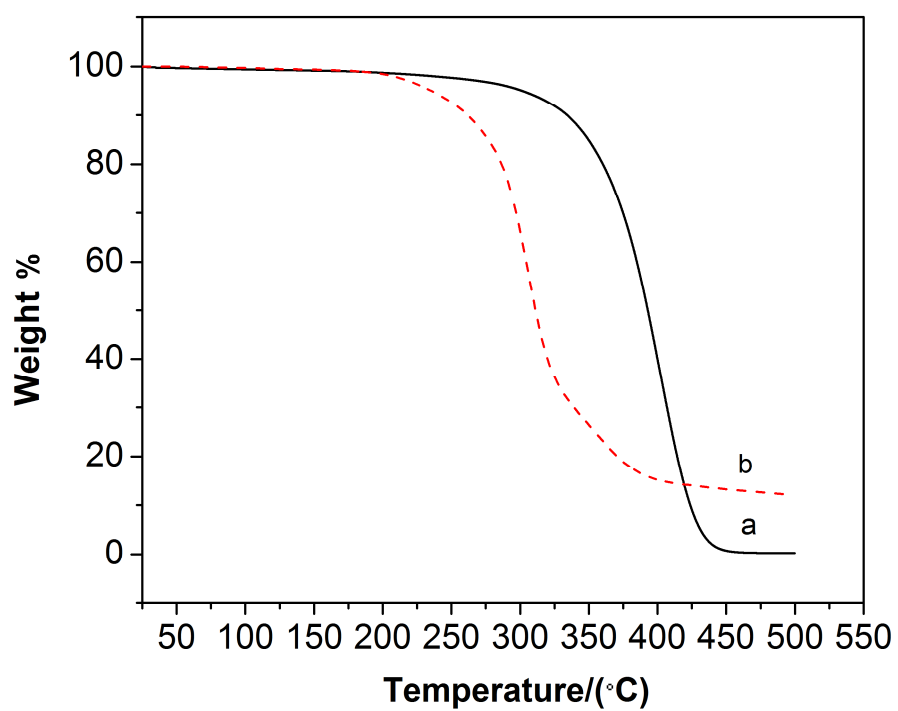

**Fig. S4** TGA curves for the polymer and electrolyte. (a)PMH<sub>12</sub>-25, (b)PMH<sub>12</sub>-25 ([Li]:[EO] =1:20).
